# Supplementary material
Source: PubMed Central journal article supplement (PMC8149475)

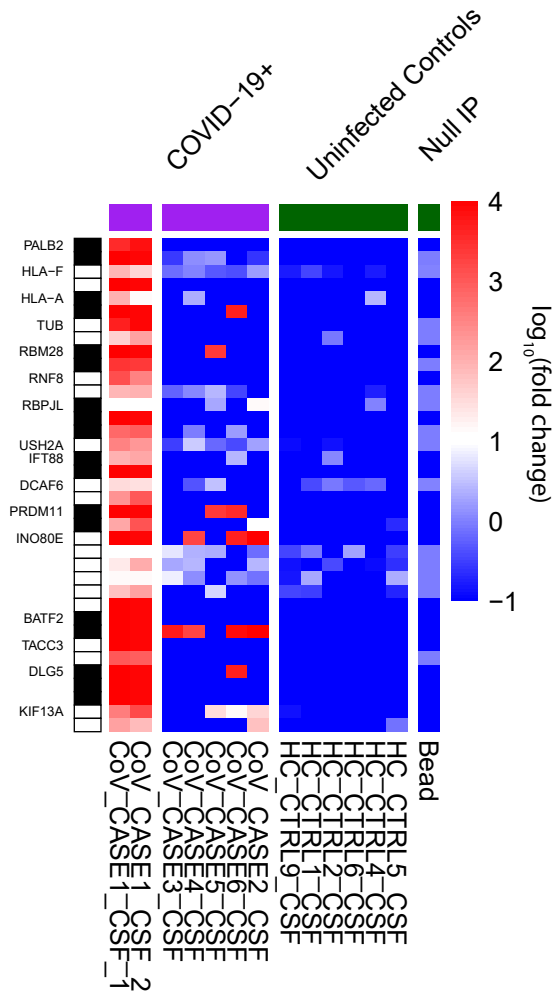

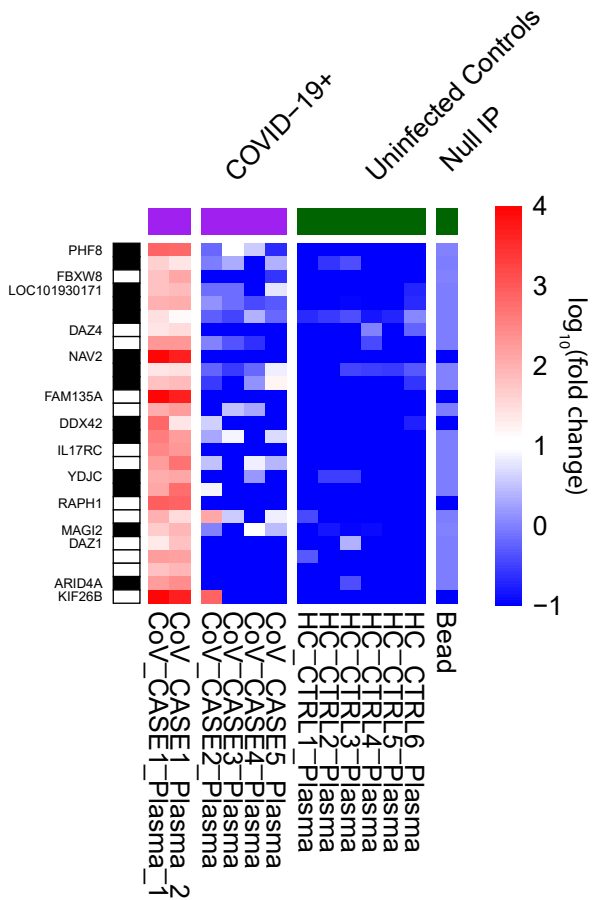

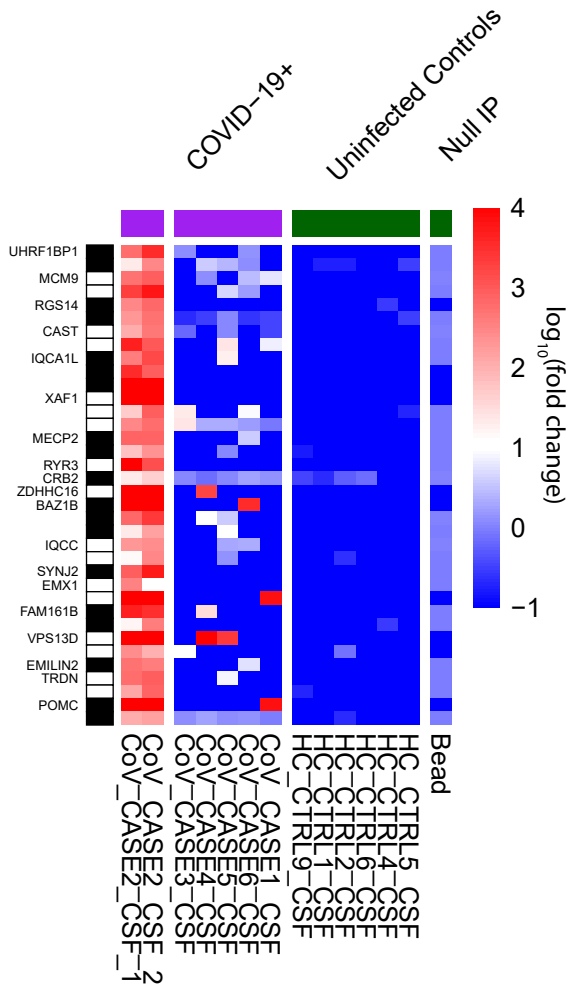



COVID-19+

Uninfected Controls  
Null IP

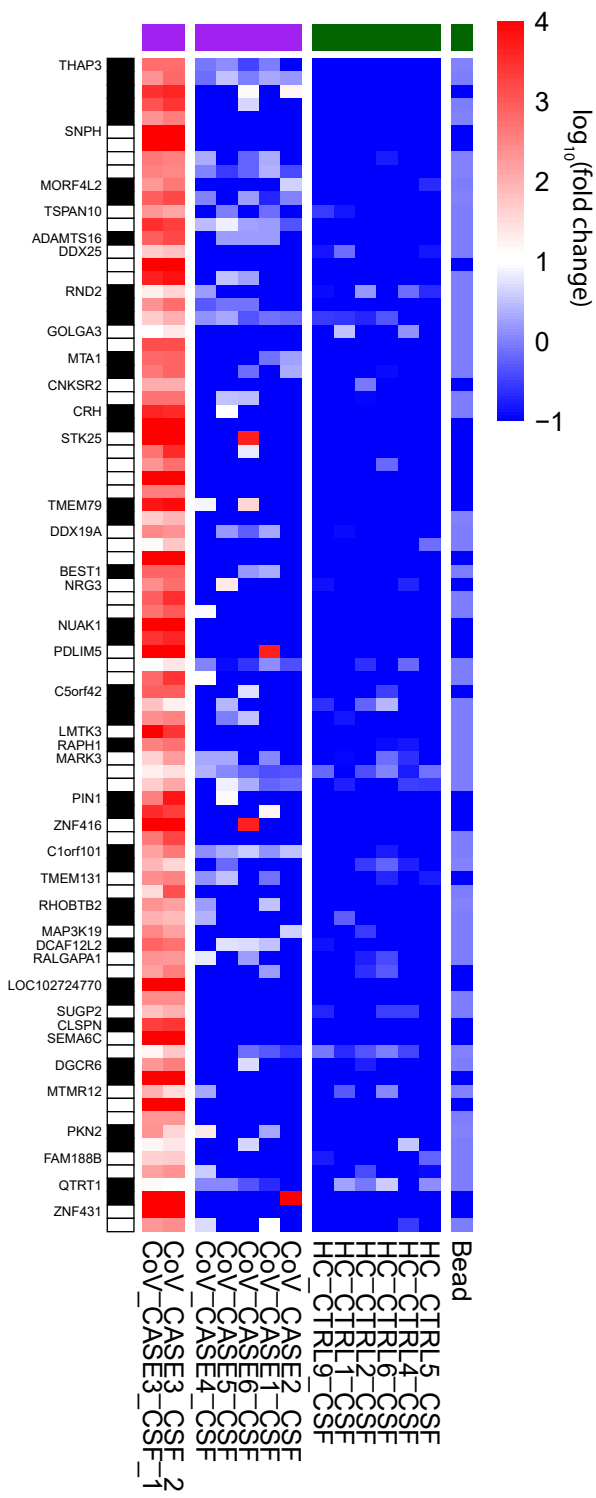

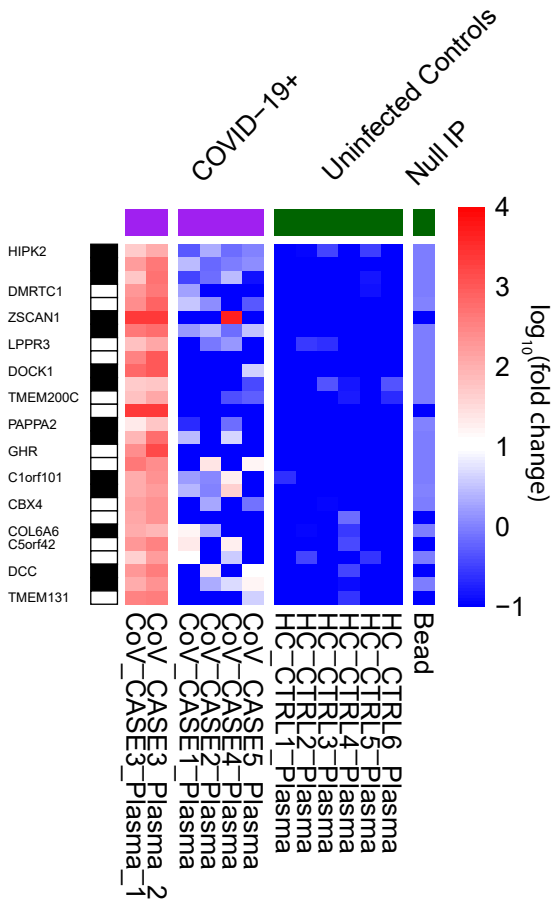







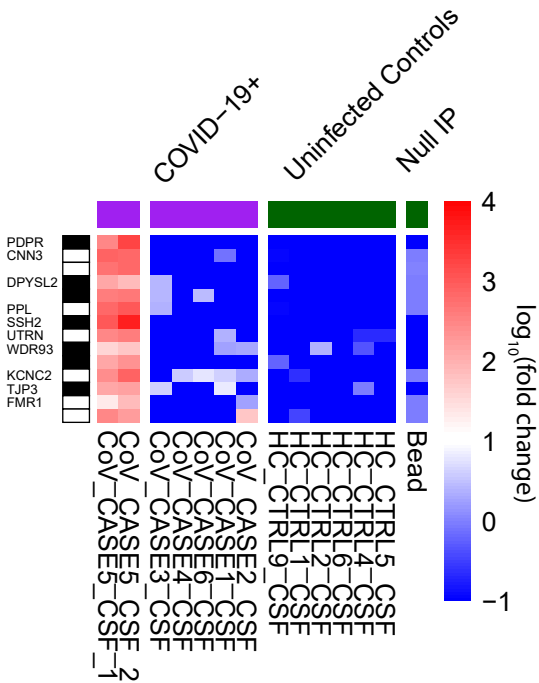

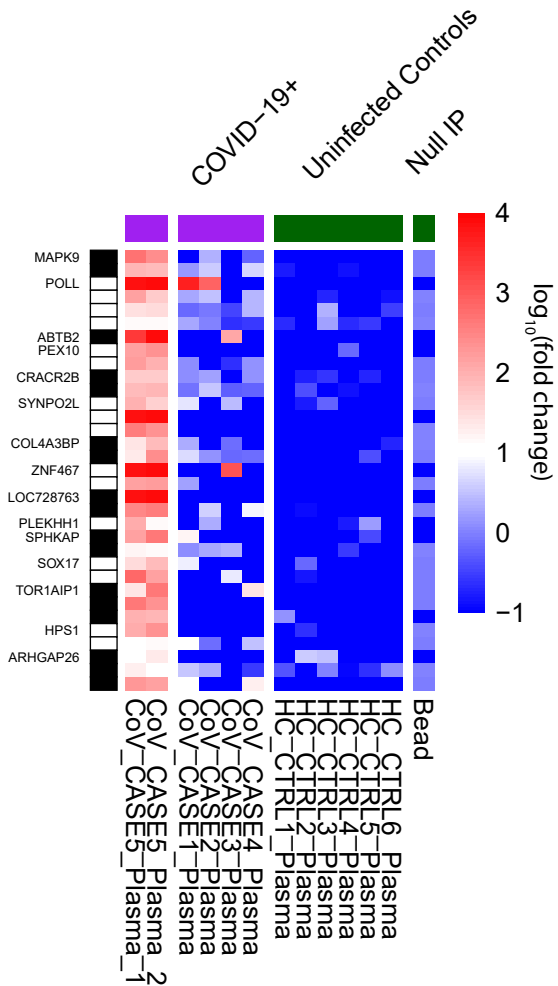

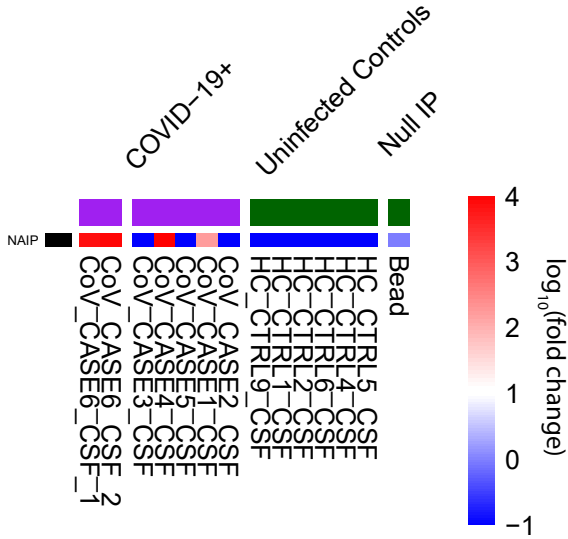

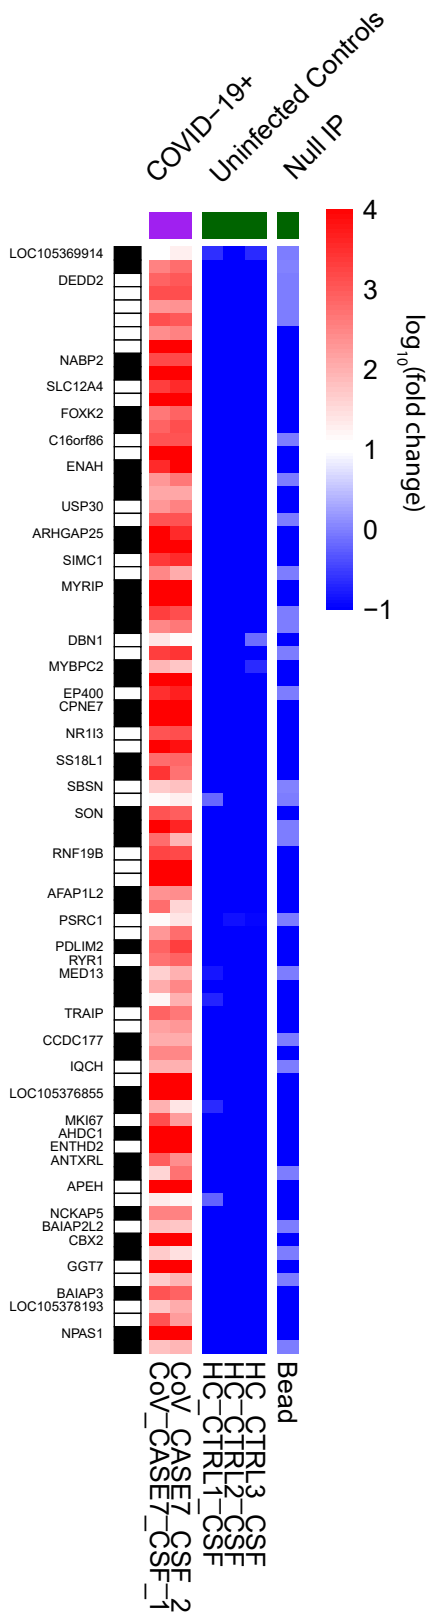

Supplement: mmc5.pdf [file mmc5.pdf]
